# Supplementary material
Source: Research Square preprint supplement (doi:10.21203/rs.3.rs-9277067/v1)
Supplement: Supplementary file 1 [file 560e083ea5b8f490a95ac7ee.docx]

**Table 1**

Effects of different vegetation restoration patterns on plant growth. Ms0 represents alfalfa in the monoculture system; Msm represents alfalfa in the intercropping system; Lp0 represents the monoculture system. The lowercase letters within the same row denote significant differences between treatments at each time point (p < 0.05).

|  | | | Ms | | | | Lp | | |
| --- | --- | --- | --- | --- | --- | --- | --- | --- | --- |
| Ms0 | | Msm | | Lp0 | | Lpm |
| 30d | Plant height (cm) | 7.30±1.04 a | | 6.96±0.47 a | | 26.10±0.70 b | | 28.90±1.53 a | | |
| Dry weight (g/plant) | 0.04±0.01 a | | 0.02±0.01 a | | 0.05±0.01 b | | 0.08±0.01 a | | |
| 60d | Plant height (cm) | 8.53±0.55 a | | 8.39±1.66 a | | 27.53±0.89 b | | 35.00±3.75 a | | |
| Dry weight (g/plant) | 0.10±0.01 a | | 0.10±0.02 a | | 0.27±0.05 b | | 0.50±0.03 a | | |
| 90d | Plant height (cm) | 14.33±0.72 a | | 8.47±0.64 b | | 41.67±0.40 b | | 49.14±3.63 a | | |
| Dry weight (g/plant) | 0.42±0.01 a | | 0.11±0.02 b | | 0.46±0.01 b | | 0.76±0.06 a | | |
